# Supplementary material
Source: PubMed Central journal article supplement (PMC3500542)
Supplement: supp_112.198770_jpet_198770_suppl_methods.pdf [file supp_112.198770_jpet_198770_suppl_methods.pdf]

Ryan T. Bushey and Philip Lazarus

**Identification and functional characterization of a novel UGT2A1 splice variant: Potential importance in tobacco-related cancer susceptibility**

**Supplemental Materials and Methods**

*Generation of a UGT2A1<sub>i2</sub> over-expressing cell line and UGT2A1<sub>i2</sub> cell*

*homogenate.* UGT2A1<sub>exonΔ3</sub> was cloned from pooled lung RNA using *Pfu* Polymerase and the UGT2A1\_S1 and UGT2A1\_AS1 primers. Following gel extraction and sequencing of the PCR product of the appropriate size, the verified UGT2A1<sub>exonΔ3</sub> cDNA was cloned into the pcDNA 3.1/V5-His-TOPO vector using standard protocols and grown in One Shot TOP10 competent E.Coli. After direct dideoxy sequencing for sequence confirmation and a large-scale plasmid preparation, electroporation (200 V, 1000 μF) with 10 μg of the pcDNA 3.1/V5-His-TOPO\_UGT2A1<sub>exonΔ3</sub> vector was used to generate the HEK293 cell line over-expressing UGT2A1<sub>i2</sub>. Cells were grown in DMEM supplemented with 10% FBS, 1% penicillin-streptomycin, and 400 μg/mL G418 to 75% confluence. Cell homogenates were prepared essentially as previously described in 1X Tris-buffered saline (25 mM Tris base, 138 mM NaCl and 2.7 mM KCl; pH 7.4) (Dellinger et al., 2006; Sun et al., 2006). Total RNA was extracted using the RNeasy Mini kit using the manufacturer's protocols. Homogenate protein concentrations were determined using the BCA protein assay.

*Determination of UGT2A1<sub>i1</sub> homo-oligomerization.* An inducible co-expression system, similar to that used to investigate UGT2A1<sub>1</sub>:UGT2A1<sub>i2</sub> hetero-oligomerization, was used to examine potential UGT2A1<sub>i1</sub> homo-oligomerization.

Creation of the pcDNA 6.2/V5/GW/D-TOPO\_wtUGT2A1 vector was described previously in the Materials and Methods. Wild-type UGT2A1 was cloned into the FLAG tagged, hygromycin resistance containing pEGSH vector, using UGT2A1\_S3 and UGT2A1\_AS3 primers as described previously. A HEK293 cell line stably expressing the pcDNA6.2/V5/GW/D-TOPO\_wtUGT2A1, pEGSH\_wtUGT2A1, and pERV vectors was created as described in the Materials and Methods. UGT2A1\_i1\_FLAG expression was induced by treating HEK293 cells at 50% confluence with 10  $\mu$ M of PonA (in ethanol) for 12 h. Vehicle (0.01% ethanol) was added to HEK293 cells as a negative control. Determination of UGT2A1\_i1\_V5 and UGT2A1\_i1\_FLAG expression levels using the anti-V5 and anti-FLAG antibodies, the use of the anti-UGT2A1 antibody to confirm UGT2A1\_i1\_V5 and UGT2A1\_i1\_FLAG levels, and co-IP experiments were completed using identical conditions to that described for UGT2A1\_i1\_V5 and UGT2A1\_i2\_FLAG hetero-oligomerization.
